# Supplementary material for: Tailoring Chemometric Models on Blood-Derived Cultures Secretome to Assess Personalized Cancer Risk Score
Source: Cancers (Basel). 2020 May 26;12(6):1362. doi: 10.3390/cancers12061362 (PMC7352557; doi:10.3390/cancers12061362)
Supplement: Supplementary file 1 [file cancers-12-01362-s001.xlsx]

## Sheet: Foglio1
ID Number	SEX	AGE	STATUS	number blood samples	S-Phase (%)	MGAs (ng/ml)
SB049h	f	46	Health	2	11	0.10038
SB047h	f	54	Health	2	14	1.42795
SB044h	m	44	Health	3	31	1.30777
SB018h	f	25	Health	2	9	0.30264
SB039h	m	57	Health	2	8	0.383889
SB027h	m	65	Inflammation	3	8.3	0.412288
SB026h	f	39	Health	3	6	0.453326
SB075h	f	33	Health	3	9.5	0.663713
SB079h	f	69	Health	3	21	1.16823
SB081h	m	52	Health	2	7.8	0.514213
SB025h	m	57	Health	2	9.1	0.717236
SB016h	m	64	Health	2	8.9	0.55214
SB015h	f	60	Health	2	7.4	0.471996
SB040h	f	27	Health	2	5	0.432112
SB0489h	m	38	Health	2	6	0.656693
SUB066h	m	78	Healthy Control	2	20.8
SUB110h	m	76	Healthy Control	2	0
SUB071h	m	70	Healthy Control	2	19
SUB065h	m	69	Healthy Control	2	23	0.773958
SUB111h	m	69	Healthy Control	2	11	0.552124
SUB054h	m	65	Inflammation	2	6	0.471996
SUB086h	m	65	Inflammation	2	33	0.287862
SUB107h	m	65	Healthy Control	2	2
SUB060h	m	64	Healthy Control	2	6.8	0.388872
SUB064h	m	60	Inflammation	2	21
SUB073h	m	60	Inflammation	2	36	0.872875
SUB082h	m	59	Inflammation	2	32.5	0.575385
SUB085h	m	58	Healthy Control	2	7	1.30136
SUB053h	m	57	Healthy Control	2	22	0.656926
SUB059h	m	57	Healthy Control	2	9	0.422837
SUB118h	m	55	Inflammation	2	32.5	0.432112
SUB100h	m	55	Inflammation	2	29.8	0.214459
SUB081h	m	55	Healthy Control	2	6
SUB108h	m	55	Healthy Control	2	0.4	0.453326
SUB095h	m	55	Healthy Control	2	27.9	0.302753
SUB051h	m	54	Healthy Control	2	3
SUB102h	m	54	Previosus tumor/les ben	2	5.8	0.412288
SUB098h	m	53	Healthy Control	2	37	0.453366
SUB058h	m	52	Healthy Control	2	7	0.10038
SUB087h	m	47	Previosus tumor/les ben	2	8.99	1.42795
SUB089h	m	46	Healthy Control	2	29.8	1.30777
SUB092h	m	45	Healthy Control	2	33
SUB090h	m	43	Healthy Control	2	30
SUB099h	m	42	Healthy Control	2	32	0.569291
SUB112h	m	42	Previosus tumor/les ben	2	32
SUB070h	m	41	Healthy Control	2	23.7
SUB084h	m	41	Previosus tumor/les ben	2	32	0.359587
SUB116h	m	41	Healthy Control	2	32
SUB097h	m	40	Healthy Control	2	30.2
SUB063h	m	38	Previosus tumor/les ben	2	3	0.328834
SUB103h	m	32	Healthy Control	2	10
SUB113h	m	32	Previosus tumor/les ben	2	32.1	1.16496

## Sheet: Foglio2
ID Number	Type of tumor	GRADE	STAGE	AGE	SEX	number blood samples	S-Phase (%)	MGAs (ng/ml)
PZ054k	carcinoma colon	2	III	59	f	2	78	0.406742
PZ053br	carcinoma breast	2	III	50	f	2	59	1.47752
PZ052br	carcinoma breast	2	II	47	f	2	37	0.966096
PZ051br	carcinoma breast	2	II	55	f	2	38	0.567861
PZ045br	carcinoma breast	2	III	55	f	2	77	0.839073
PZ043br	carcinoma breast	3	III	32	f	3	82	1.79816
PZ048br	carcinoma breast	2	III	64	f	3	66	1.16822
PZ050br	carcinoma breast	3	III	87	f	2	88	0.59956
PZ023br	carcinoma breast	2	III	46	f	3	76	0.727233
PZ022br	carcinoma breast	2	III	56	f	2	72	1.36217
PZ021br	carcinoma breast	1	I	72	f	3	45	1.10396
PZ020br	carcinoma breast	2	II	42	f	2	46	0.998779
PZ019br	carcinoma breast	3	III	50	f	3	54	0.70937
PZ042k	carcinoma colon	1	I	56	m	2	50	0.705165
PZ041k	carcinoma colon	2	II	64	m	2	51	0.889114
PZ038br	carcinoma breast	3	III	30	f	3	76	0.57388
PZ037m	melanoma	1	I	45	f	2	48.7	1.07887
PZ036m	melanoma	2	I	70	m	2	42	1.04112
PZ035m	melanoma	2	IV	49	m	2	39.6	0.900808
PZ034k	carcinoma colon	2	III	80	f	2	66	1.1909
PZ033l	carcinoma lung	2	III	62	f	2	78	1.11367
PZ032br	carcinoma breast	2	II	63	f	2	40.6
PZ031br	carcinoma breast	2	I	90	f	2	41	0.50755
PZ030g	glioblastoma	4	IV	67	m	2	77	1.15587
PZ029br	carcinoma breast	3	II	73	f	2	55.9	0.718519
PZ022g	glioblastoma	4	IV	75	f	2	69	0.988977
PZ059g	glioblastoma	4	IV	88	f	2	58	0.276603
PZ083k	carcinoma colon	3	IV	67	m	3	86	0.926769
PZ070g	glioblastoma	4	IV	70	m	2	75
PZ062br	carcinoma breast	3	IV	62	f	2	73	1.17609
PZ063br	carcinoma breast	2	II	74	f	2	43.9	1.31529
PZ072br	carcinoma breast	2	III	88	f	2	49	0.973175
PZ055m	melanoma	1	I	62	m	3	42	0.79375
PZ061m	melanoma	3	III	55	m	3	59	0.684872
PZ024m	melanoma	2	II	52	m	2	42
PZ073t*	carcinoma thyroid	2	I	24	f	3	39	0.700787
PZ074k	carcinoma colon	2	II	54	f	2	40	0.574534
PZ076k	carcinoma colon	2	II	47	m	3	62	0.665975
PZ077br	carcinoma breast	2	I	42	f	3	44
PZ083br	carcinoma breast	1	I	31	f	2	47	1.21487
PZ180ov	carcinoma ovary	1	II	3	F	2	54
PZ012356ov	carcinoma ovary	3	II	49	F	2	65
PZ102ov	carcinoma ovary	2	II	33	F	2	44.6
PZ012374pc	carcinoma pancreas	3	IV	32	F	2	55
PZ012371pc	carcinoma pancreas	2	II	72	F	2	65	1.41809
PZ172e	carcinoma uterine	2	III	33	F	2	54	1.33186
PZ0104t	carcinoma thyroid	1	III	47	F	2	62	1.18653
PZ012345t	carcinoma thyroid	3	IV	65	F	2	63	1.65425
PZ012366t	carcinoma thyroid	2	III	40	F	2	33.1	1.31892
PZ094t	carcinoma thyroid	2	III	34	F	2	88
